# Supplementary material for: Underway determination of dissolved inorganic carbon in estuarine waters by gas-diffusion flow analysis with C4D detection
Source: Royal Society of Chemistry journal article supplement (doi:10.1039/c2ay25113b), 2012-01-01
Supplement: c2ay25113b.pdf [file c2ay25113b.pdf]

# Underway determination of dissolved inorganic carbon in estuarine waters by gas-diffusion flow analysis with $C^4D$ detection

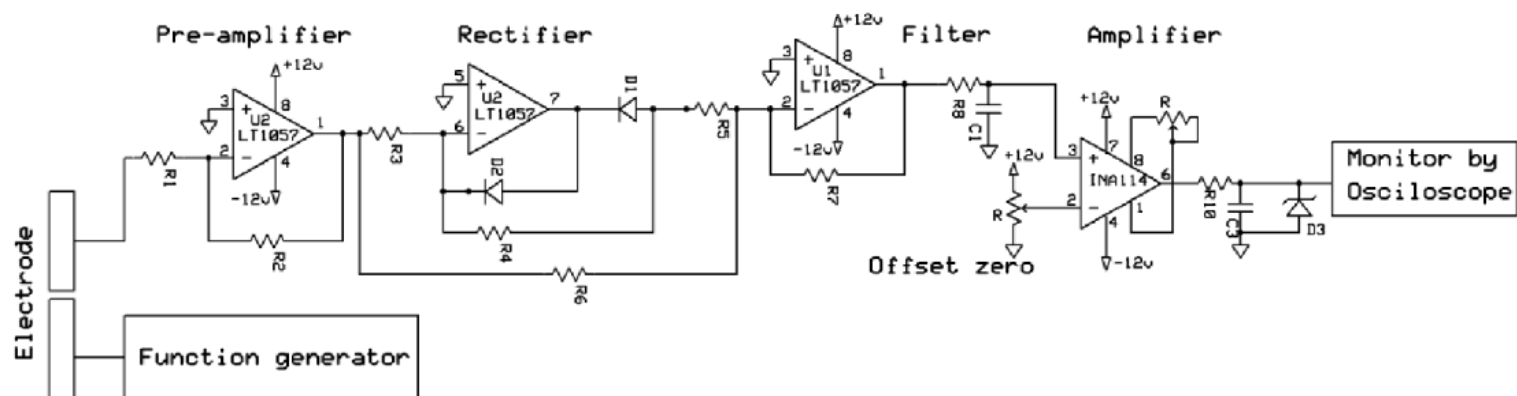

Figure S1

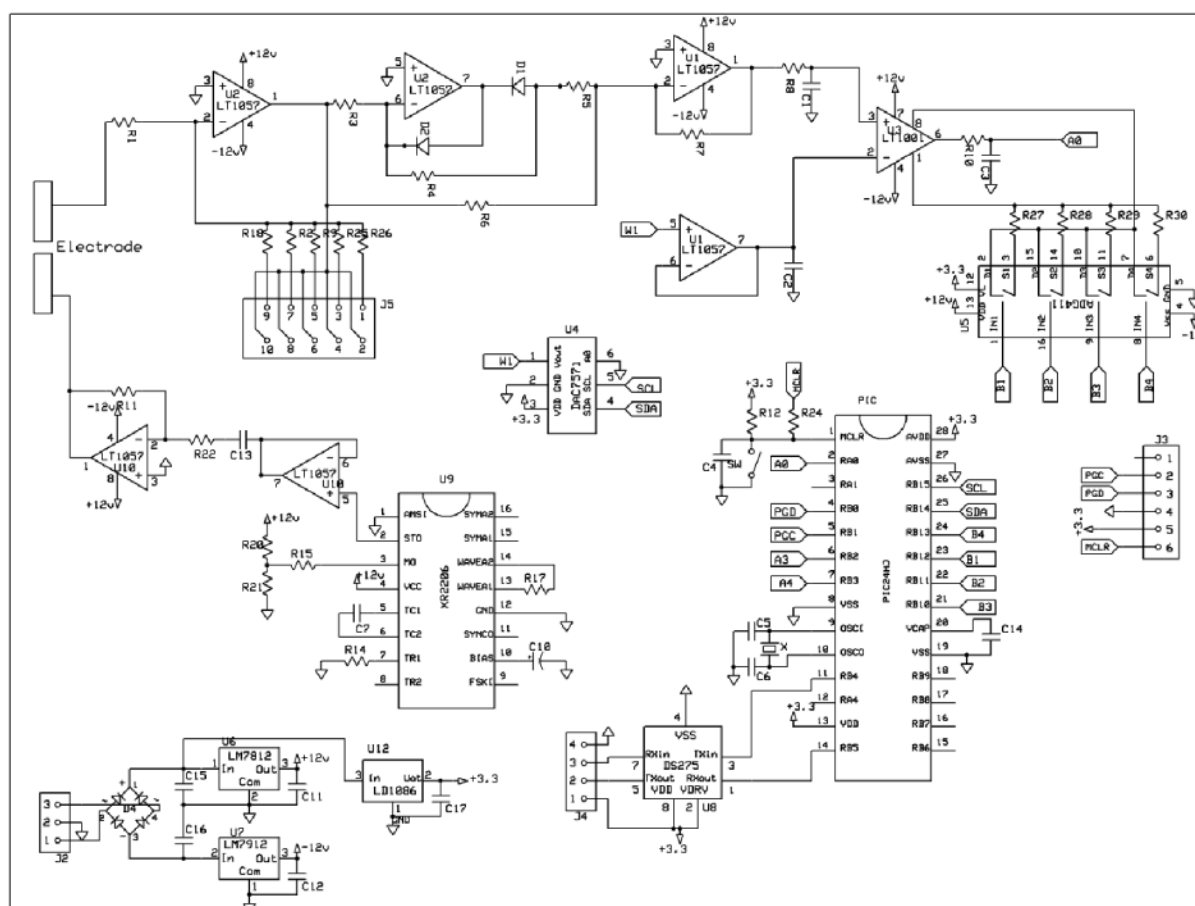

Figure S2
